# Supplementary material for: Splendid four-mode optical thermometry design based on thermochromic Cs3GdGe3O9:Er3+ phosphors
Source: Royal Society of Chemistry journal article supplement (doi:10.1039/d2tc01812h), 2022-01-01
Supplement: d2tc01812h1.pdf [file d2tc01812h1.pdf]

## Supporting Information

### Splendid four-mode optical thermometry design based on the thermochromic $\text{Cs}_3\text{GdGe}_3\text{O}_9:\text{Er}^{3+}$ phosphors

Rongfei Wei<sup>a\*</sup>, Fumin Lu<sup>a</sup>, Li Wang<sup>a</sup>, Fangfang Hu<sup>a</sup>, Xiang ling Tian<sup>b\*</sup>, Hai Guo<sup>a\*</sup>

Table S1 Rietveld XRD refinement data of  $\text{CGGO}:0.9\text{Er}^{3+}$ .

| Sample                 | Standard data            | CCGO:0.9Er <sup>3+</sup> |
|------------------------|--------------------------|--------------------------|
| Space group            | Pna21(33) - orthorhombic | Pna21(33) - orthorhombic |
| $\alpha=\beta=\gamma$  | 90°                      | 90°                      |
| <i>a</i>               | 13.8827 Å                | 13.7902 Å                |
| <i>b</i>               | 7.1594 Å                 | 7.1018 Å                 |
| <i>c</i>               | 12.7676 Å                | 12.7181 Å                |
| <i>V</i>               | 1268.99 Å <sup>3</sup>   | 1245.57 Å <sup>3</sup>   |
| $\chi^2$               | /                        | 0.56                     |
| <i>R</i> <sub>wp</sub> | /                        | 8.74%                    |
| <i>R</i> <sub>p</sub>  | /                        | 5.68%                    |

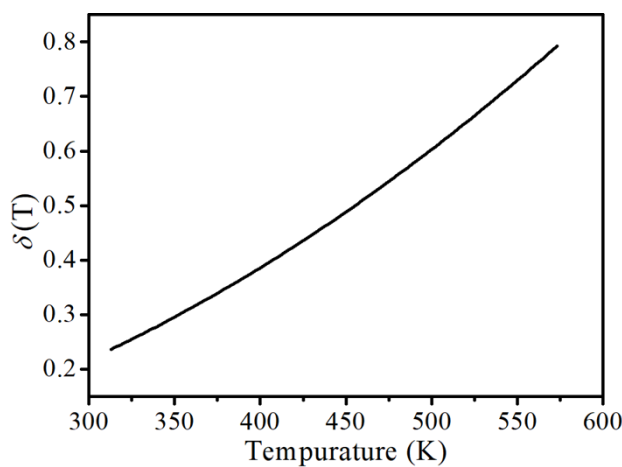

Fig. S1 Temperature resolution of  $\text{CGGO}:0.9\text{Er}^{3+}$ .
